1 **TITLE: Recent origin of an XX/XY sex-determination system in the ancient plant**  
2 **lineage *Ginkgo biloba***

3

4 **AUTHORS:** He Zhang<sup>1,7,†</sup>, Rui Zhang<sup>1,†</sup>, Xianwei Yang<sup>1,†</sup>, Kai-Jie Gu<sup>2,6,†</sup>, Wenbin  
5 Chen<sup>4,†</sup>, Yue Chang<sup>1</sup>, Qiwu Xu<sup>1</sup>, Qun Liu<sup>1</sup>, Yating Qin<sup>1</sup>, Xiaoning Hong<sup>1,12</sup>,  
6 Yin<sup>2,1</sup>, Inge Seim<sup>9,10</sup>, Han-Yang Lin<sup>2</sup>, Wen-Hao Li<sup>2</sup>, Jinfu Tian<sup>1</sup>, Shanshan Li<sup>1</sup>,  
7 Liu<sup>4</sup>, Junnian Liu<sup>1</sup>, Shanshan Liu<sup>1</sup>, Xiaoshan Su<sup>1</sup>, Congyan Wang<sup>1</sup>, Fu-Ming Zhang<sup>3</sup>,  
8 Song Ge<sup>3</sup>, Cheng-Xin Fu<sup>2</sup>, Simon Ming-Yuen Lee<sup>5</sup>, Yiji Xia<sup>7</sup>, Jian Wang<sup>4,8,13</sup>,  
9 Huanming Yang<sup>4,8,13</sup>, Guangyi Fan<sup>1,5,\*</sup>, Xun Xu<sup>1,8,\*</sup>, Yun-Peng Zhao<sup>2,6,\*</sup> & Xin

10 **AFFILIATIONS:**

11 <sup>1</sup>BGI-Qingdao, BGI-Shenzhen, Qingdao 266555, China.

12 <sup>2</sup>The Key Laboratory of Conservation Biology for Endangered Wildlife of the  
13 of Education, College of Life Sciences, Zhejiang University, Hangzhou 310058,

14 <sup>3</sup>State Key Laboratory of Systematic and Evolutionary Botany, Institute of Botany,  
15 Chinese Academy of Sciences, Beijing 100093, China.

16 <sup>4</sup>BGI-Shenzhen, Shenzhen 518083, China.

17 <sup>5</sup>State Key Laboratory of Quality Research in Chinese Medicine, Institute of Chinese  
18 Medical Sciences, University of Macau, Macao, China.

19 <sup>6</sup>Laboratory of Systematic & Evolutionary Botany and Biodiversity, Institute of  
20 Ecology and Conservation Center for Gene Resources of Endangered Wildlife,  
21 Zhejiang University, Hangzhou 310058, China.

22 <sup>7</sup>Department of Biology, Hong Kong Baptist University, Hong Kong, China.

23 <sup>8</sup>China National GeneBank, BGI-Shenzhen, Shenzhen 518120, China.

24 <sup>9</sup>Integrative Biology Laboratory, College of Life Sciences, Nanjing Normal University,  
25 Nanjing 210023, China.

26 <sup>10</sup>Comparative and Endocrine Biology Laboratory, Translational Research  
27 Institute-Institute of Health and Biomedical Innovation, School of Biomedical  
28 Sciences, Queensland University of Technology, Brisbane 4102, Queensland,  
29 Australia.

30 <sup>11</sup>BGI-Fuyang, BGI-Shenzhen, Fuyang 236009, China.

31 <sup>12</sup>BGI Education Center, University of Chinese Academy of Sciences, Shenzhen  
32 518083, China.

33 <sup>13</sup>James D. Watson Institute of Genome Sciences, Hangzhou 310058, China.

34

35 <sup>†</sup>These authors contributed equally to this work

36 <sup>\*</sup>For correspondence (e-mails [liuxin@genomics.cn](mailto:liuxin@genomics.cn), [ypzhao@zju.edu.cn](mailto:ypzhao@zju.edu.cn),

37 [xuxun@genomics.cn](mailto:xuxun@genomics.cn) or [fanguangyi@genomics.cn](mailto:fanguangyi@genomics.cn))

## 38 ABSTRACT

39 Sexual dimorphism like dioecy (separate male and female individuals) have evolved  
 40 in diverse multicellular eukaryotes while the molecular mechanisms underlying the  
 41 development of such a key biological trait remains elusive (1). The living fossil  
 42 *Ginkgo biloba* represents an early diverged lineage of land plants with dioecy.  
 43 However, its sex-determination system and molecular basis have long been  
 44 controversial or unknown. In the present research, we assembled the first and largest  
 45 to date chromosome-level genome of a non-model tree species using Hi-C data. With  
 46 this reference genome, we addressed both questions using genome resequencing data  
 47 gathered from 97 male and 265 female trees of ginkgo, as well as transcriptome data  
 48 from three developmental stages for both sexes. Our results support vertebrate-like  
 49 XY chromosomes for ginkgo and five potential sex-determination genes, which may  
 50 originate ~14 million years ago. This is the earliest diverged sex determination region  
 51 in all reported plants as yet. The present research resolved a long-term controversy,  
 52 lay a foundation for future studies on the origin and evolution of plant sexes, and  
 53 provide genetic markers for sex identification of ginkgo which will be valuable for  
 54 both nurseries and field ecology of ginkgo.

55

## 56 MAIN TEXT

57 Dioecy (separate male and female individuals) and sex chromosomes are common in  
 58 animals, but rare in plants (2). Plants appear to have sex-determination systems  
 59 developed at different evolutionary timeslines, whereas the best studied animal  
 60 systems are ancient. The repeated independent evolution of sex chromosomes in  
 61 plants provide a unique system studying the time course of evolutionary events in sex  
 62 chromosomes (3). Sex chromosomes in most flowering plants (angiosperm) are  
 63 cytologically homomorphic or have very small non-recombining sex-determination  
 64 regions on homomorphic sex chromosomes (4-6). Remarkable progresses have been  
 65 achieved on understanding sex-determination in plants by applying genomic  
 66 approaches in papaya (*Carica papaya*), cucumber (*Cucumis sativus*), and white  
 67 campion (*Silene latifolia*) (2). In contrast, sex chromosomes are heteromorphic in all  
 68 the six known species (0.6%) from three families (Cycadaceae, Ginkgoaceae and  
 69 Podocarpaceae) in gymnosperm (plants with naked seeds), possibly reflecting an

70 ancient evolutionary history (3). Unfortunately, the confirmation of sex chromosomes  
71 and reconstruction of their evolutionary history remain to be explored in the sister  
72 lineage of flowering plants.

73 The dioecious maidenhair tree, *Ginkgo biloba* (ginkgo), a long-lived tree species  
74 which represents one of the four gymnosperm lineages, provides an ideal model for  
75 the origin of dioecy in seed plants. Ginkgo is an ancient lineage present in the Jurassic  
76 period 170 million years ago (7). The discovery of multiflagellated swimming sperm  
77 from a male ginkgo tree in 1896 hinted at a striking example of convergent evolution  
78 (8). Its sex-determination system, XX/XY (9, 10) vs. ZW/ZZ (11, 12), remains  
79 controversial and was based on previous work using optical microscope or  
80 Fluorescence *in Situ* Hybridization (FISH) approaches, which may suffer unreliability  
81 or ambiguity (9-11, 13). Thus, the genetic basis of the sex determination of ginkgo has  
82 remained poorly explored (2, 9, 11, 12, 14) largely due to its large and complex  
83 genome (15).

84 We used three-dimensional proximity information obtained by chromosome  
85 conformation capture sequencing (Hi-C) to order and orient the draft genome  
86 assembly of *Ginkgo biloba* (15) (**fig. S1**), generating 12 chromosomes spanning 9.03  
87 Gb (~94% of the whole genome) (**tables S1, S2**). The chromosome-level assembly  
88 was well supported by the inter- and intra-chromosome contact matrices of the Hi-C  
89 data, and revealed an anti-diagonal pattern within a chromosome and clear separations  
90 between chromosomes (**fig. S2a**). Moreover, chromosome sequence lengths were  
91 highly correlated with the physical length of chromosomes described in a previous  
92 karyotype study (13) ( $R^2=0.98$ , **fig. S2b**), further supporting the high quality of our  
93 assembly.

94 We performed a genome-wide association study (GWAS) of ~1.5 million SNPs in 97  
95 male and 265 female specimens sequenced at an average depth of ~8× (**table S3**;  
96 described in our parallel study (16): Zhao *et al.*, submitted simultaneously). A ~4.6  
97 Mb region on chromosome 2 (Chr2: 380.00 Mb–384.60 Mb) was identified as a  
98 candidate sex-determination region (SDR) due to its significant association with sex  
99 (**Fig. 1A** and **fig. S3**, corrected  $P$ -value < 0.05). We computed the fixation index ( $F_{ST}$ )  
100 (17) between the males and females in the whole genome, showing substantially  
101 higher differentiation on the similar region of chromosome 2 (**Fig. 1B**). Finally, the

linkage disequilibrium (LD) of this region was substantially stronger than for other regions (**Fig. 1C** and **fig. S4**), consistent with the previous reports of enhanced LD on sex chromosomes in other species(18). To further validate this region as an SDR, six randomly-selected SNPs were sequenced in 24 males and 24 females using PCR and Sanger sequencing, revealing a high correlation between the SNPs and sexes (**fig. S5**). One SNP for PCR validation matched amplification products in 70.83% males with no product in all females (**Fig. 1D**). Using 19,164 SDR-associated SNPs, 97 males and 265 females were completely clustered into two distinct groups, and the remaining 183 sequenced ginkgo individuals with unknown sex information were classified into the two sex clusters, i.e., 75 males and 108 females (**Fig. 1E**).

Four male and five female accessions of ginkgo were resequenced at higher sequencing depth (~30×). Mapping the reads back to the reference genome continued to support the SDR (**figs. S6 and S7**). Males and females showed similar mapping depth (~32×) at both ends of the SDR (S1: 380.00–381.46 Mb and S3: 383.52–384.60 Mb) (**Fig. 2A**). The mapping depth in the middle of SDR (S2: 381.46–383.52 Mb) for males was ~17× (**Fig. 2A**), which was about half of that of females in S2 and also of males at the whole-genome level, indicating a higher divergence between males in S2. We observed notably higher SNP polymorphism in the S1 and S3 regions in males (97 males and 265 females) (**Fig. 2B**), and substantially higher heterozygosity ( $P = 5.84 \times 10^{-66}$ ) in the S1 and S3 regions in the specimens subjected to deeper resequencing (~30×, four males and five females) (**Fig. 2C**). A ubiquitous feature of species with heteromorphic sex chromosomes (e.g. males with an X and a Y chromosome, females with two X chromosomes, as observed in mammals and fruit flies), is the presence of only one X chromosome in the male(1). Contrasting male and female, the copy number of S2 was one in males and two in females (**Fig. 2D**). The copy number of flanking regions (including S1 and S3) were two in both sexes(19). Collectively, we provide multiple lines of evidence of a classic XX/XY sex-determination system in ginkgo in which males harbor one allele (X) identical to the female alleles and one differentiated allele (Y; manifested by substantial divergence in SDR S2).

The origin of dioecy and sex chromosomes in ginkgo was inferred based on the three SDRs (S1, S2 and S3). We anticipated the highest difference between X and Y alleles

134 in S2 because only the X allele could be assembled and reads from the Y allele could  
135 not be mapped back to this region. For S1 and S3, we had genotype data of both X  
136 and Y alleles, thus we calculated the pair-wise distances between four males and five  
137 females and estimated the divergence times of S1 and S3 to be 14.18 (11.04–16.64)  
138 million years ago (MYA) and 9.44 (4.48–11.42) MYA, respectively (**table S4**).  
139 Considering the higher difference among X and Y alleles in S2, the divergence time of  
140 the associated SDR in ginkgo could be more ancient than 14.18 MYA. We were not  
141 able to reconstruct the most divergent part of the Y allele, possibly because of the  
142 inherent high complexity of the ginkgo genome. The emergence timing of ginkgo  
143 SDR, ~14 MYA, substantially precedes that for the known flowering plants, e.g., ~1.5  
144 MYA for *Rumex hastatulus* with an XY sex-determination system, 5–10 MYA for  
145 *Silene latifolia*, and ~7.3 MYA for *Carica papaya*(20). Despite the oldest origin of  
146 ginkgo sex chromosomes in the known land plants to date, their timing as recent as  
147 ~14 MYA is in contrast to the ancient origin of ginkgo lineage and reproductive  
148 organs. Ginkgoalean and *Ginkgo* genus may have originated 320 MYA (21, 22) and  
149 170 MYA (7), respectively. The timing for the origin of the extant species, *Ginkgo*  
150 *biloba*, was estimated 56–58 MYA (23). Fossils of ginkgo-like pollen and ovulate  
151 organs have long been known from the Upper Triassic and the Palaeozoic,  
152 respectively (22). Such a contrast again suggests a young origin of sex chromosomes  
153 in seed plants despite ancient origin of dioecy.

154 A critical property of an SDR is the presence of genes, typically transcription factors,  
155 associated with sexually dimorphic gene expression and traits (1). There were 16  
156 protein-coding genes located in the ginkgo SDR (**Fig. 3A, Table 1** and **table S5**),  
157 among which five genes (*Gb\_15883*, *Gb\_15884*, *Gb\_15885*, *Gb\_15886*, and  
158 *Gb\_28587*) were functionally annotated to be related to floral meristem development  
159 and sex determination. *Gb\_15883* and *Gb\_15884* were homologs of response  
160 regulators 12 and 2 (RR12 and RR2), proteins which respond to cytokinins and have  
161 been reported to be involved in the sex determination of kiwifruits (24). *Gb\_15885*  
162 was a homolog of early flowering 6 (ELF6), a H3K4 demethylases gene which  
163 regulates flowering time (25, 26). *Gb\_15886* was similar to Brassinosteroid-related  
164 AcylTransferase1 (AtBAT1) which regulates sex determination in maize (27).

165 *Gb\_28587* was a homolog of AGAMOUS-like 8, a member of a transcription factor  
 166 family which specifies sex organ identity during development (28).

167 To further determine the candidate sex-determination genes in ginkgo, we sequenced  
 168 32 transcriptomes from two tissues (cones and leaves, **Fig. 3B**) at various  
 169 developmental stages in each of three males and females (**table S6**). Comparison  
 170 between male and female specimens resulted in the identification of 5,831 and 132  
 171 differentially expressed genes (DEGs), respectively, in cones (reproductive organs)  
 172 and leaves between male and female individuals ( $P$ -value  $< 0.001$ ; **fig. S8a, b**). Of  
 173 these 249 were uniquely expressed, specifically expressed genes (SEGs), in either  
 174 male or female cones (**fig. S9** and **table S7**), while only two SEGs were found in  
 175 leaves. Then, we focused on 5,774 genes which showed differential gene expression  
 176 only in cones (**fig. S8c**). Five DEGs were located in the SDR, of which *Gb\_15886*  
 177 was exclusively expressed in female cones (**Fig. 3C**). To identify genes of S2 Y allele,  
 178 we *de novo* assembled and contrasted the transcriptomes of males and females. This  
 179 effort revealed five transcripts with significant divergence from the S2 X allele (~20%  
 180 identity) which can be considered candidate Y allele-derived gene products. To  
 181 understand the co-expression relationships between ginkgo genes, we performed  
 182 weighted gene co-expression network analysis (WGCNA) (29) on male and female  
 183 cone samples. This unsupervised and unbiased analysis identified a co-expression  
 184 module significantly correlating 11 of 16 genes in the SDR with sex (**fig. S10** and  
 185 **table S8**,  $P$ -value =  $1 \times 10^{-6}$ ). These genes (*Gb\_15886*, *Gb\_28585* and *Gb\_30343*) were  
 186 hubs, genes with the most connections with other genes in the network (**Fig. 3D**),  
 187 further strengthening the identified SDR. Regulatory variants (SNPs) can also  
 188 influence gene expression and provide a proxy of gene function (30).

189 We phased the X and Y haplotypes using the SNPs, resulting in 12,425, 2,067 and  
 190 4,672 SNPs phased in the S1, S2 and S3 with the average interval distances of 83 bp,  
 191 988 bp and 303 bp, respectively (**fig. S11** and **table S9**). Of these 19,164 phased SNPs,  
 192 17,533 were located in the intergenic regions and 1,361 in introns (**Fig. 3A**). Only 270  
 193 SNPs in 11 (out of 16) genes were located in the protein-coding exons. *Gb\_15885* and  
 194 *Gb\_15884* specifically expressed Y allele genotypes, while the others nine genes  
 195 expressed the X-allele or both X and Y alleles (**Fig. 3E** and **Table 1**). The  
 196 allele-specific expression of *Gb\_15885* and *Gb\_15884* in male ginkgo might suggest



197 that these genes have a critical role in sex determination analogous to *SRY* in  
198 mammals (31, 32).

199 In the present research, we identified the sex-determination region (SDR) of ginkgo  
200 and resolved its sex-determination system (XX/XY type). Our data revealed a  
201 gradually evolving and differentiating Y allele which originated approximately 14  
202 MYA older than that in angiosperm. We provided evidence of a complex  
203 sex-determination process, including the expression of male and female sex-specific  
204 genes. Our genome and transcriptome data set offers an unprecedented resource for  
205 research on dioecy and sex chromosome evolution. In addition, we provided genetic  
206 markers for sex identification in vegetative stages of ginkgo (e.g., seedlings, juvenile  
207 trees, and non-flowering trees), which will be remarkably valuable for the selection of  
208 preferred sexes in nursery and for the identification of unknown sexes in field  
209 ecology.

210

## 211 REFERENCES AND NOTES

- 212 1. T. M. Williams, S. B. Carroll, Genetic and molecular insights into the  
213 development and evolution of sexual dimorphism. *Nature Reviews Genetics* **10**, 797  
214 (2009).
- 215 2. R. Ming, A. Bendahmane, S. S. Renner, Sex chromosomes in land plants. *Annual*  
216 *Review of Plant Biology* **62**, 485-514 (2011).
- 217 3. D. Charlesworth, Plant sex chromosome evolution. *Journal of Experimental*  
218 *Botany* **64**, 405-420 (2013).
- 219 4. M. Westergaard, The mechanism of sex determination in dioecious flowering  
220 plants. *Advances in Genetics* **9**, 217-281 (1958).
- 221 5. Z. Liu *et al.*, A primitive Y chromosome in papaya marks incipient sex  
222 chromosome evolution. *Nature* **427**, 348-352 (2004).
- 223 6. T. Akagi, I. M. Henry, R. Tao, L. Comai, A Y-chromosome-encoded small RNA  
224 acts as a sex determinant in persimmons. *Science* **346**, 646-650 (2014).
- 225 7. Z. Zhou, S. Zheng, The missing link in *Ginkgo* evolution. *Nature* **423**, 821-822  
226 (2003).



- 227 8. P. Del Tredici, Wake up and smell the ginkgos. *Arnoldia*. **66**, 11-21 (2008).
- 228 9. E. H. Newcomer, The karyotype and possible sex chromosomes of *Ginkgo biloba*.  
229 *American Journal of Botany* **41**, 542-545 (1954).
- 230 10. E. G. Pollock, The sex chromosomes of the maidenhair tree. *Journal of Heredity*  
231 **48**, 290-294 (1957).
- 232 11. R. Y. Chen, W. Q. Song, X. L. Li, Study on the sex chromosomes of *Ginkgo*  
233 *biloba*. *Plant Chromosome Research* **381-86** (1987).
- 234 12. T. Y. Lan *et al.*, Microdissection and painting of the W chromosome in *Ginkgo*  
235 *biloba* showed different labelling patterns. *Botanical Studies* **49**, 33-37 (2008).
- 236 13. Y. Nakao, T. Taira, S. Horiuchi, K. Kawase, Y. Mukai, Chromosomal difference  
237 between male and female trees of *Ginkgo biloba* examined by karyotype analysis and  
238 mapping of rDNA on the chromosomes by fluorescence *in situ* hybridization. *Journal*  
239 *of the Japanese Society for Horticultural Science* **74**, 275-280 (2005).
- 240 14. B. Vyskot, R. Hobza, Gender in plants: sex chromosomes are emerging from the  
241 fog. *Trends in Genetics* **20**, 432-438 (2004).
- 242 15. R. Guan *et al.*, Draft genome of the living fossil *Ginkgo biloba*. *GigaScience* **5**,  
243 49 (2016).
- 244 16. Y. Zhao *et al.*, Resequencing 545 ginkgo genomes across the world reveals  
245 evolutionary history of the living fossil *Ginkgo biloba*. (submitted simultaneously).
- 246 17. B. S. Weir, C. C. Cockerham, Estimating *F*-statistics for the analysis of  
247 population structure. *Evolution* **38**, 1358-1370 (1984).
- 248 18. M. Slatkin, Linkage disequilibrium--understanding the evolutionary past and  
249 mapping the medical future. *Nature Reviews Genetics* **9**, 477-485 (2008).
- 250 19. H. Nakanishi *et al.*, A novel method for sex determination by detecting the  
251 number of X chromosomes. *International Journal of Legal Medicine* **129**, 23-29  
252 (2015).
- 253 20. D. Charlesworth, Plant sex chromosomes. *Annual Review of Plant Biology* **67**,  
254 397-420 (2016).
- 255 21. N. Hohmann *et al.*, *Ginkgo biloba*'s footprint of dynamic Pleistocene history

256 dates back only 390,000 years ago. *BMC Genomics* **19**, 299 (2018).

257 22. Z.-Y. Zhou, An overview of fossil Ginkgoales. *Palaeoworld* **18**, 1-22 (2009).

258 23. Z.-Y. Zhou, C. Quan, Y.-S. Liu, Tertiary ginkgo ovulate organs with associated  
259 leaves from north dakota, U.S.A., and their evolutionary significance. *International*  
260 *Journal of Plant Sciences* **173**, 67-80 (2012).

261 24. T. Akagi *et al.*, A Y-encoded suppressor of feminization arose via lineage-specific  
262 duplication of a cytokinin response regulator in kiwifruit. *Plant Cell* **30**, 780-795  
263 (2018).

264 25. B. Noh *et al.*, Divergent roles of a pair of homologous jumonji/zinc-finger-class  
265 transcription factor proteins in the regulation of *Arabidopsis* flowering time. *Plant*  
266 *Cell* **16**, 2601-2613 (2004).

267 26. Q. Hu, Y. Jin, H. Shi, W. Yang, *GmFLD*, a soybean homolog of the autonomous  
268 pathway gene *FLOWERING LOCUS D*, promotes flowering in *Arabidopsis thaliana*.  
269 *BMC Plant Biology* **14**, 263 (2014).

270 27. T. Hartwig *et al.*, Brassinosteroid control of sex determination in maize.  
271 *Proceedings of the National Academy of Sciences of the United States of America* **108**,  
272 19814-19819 (2011).

273 28. K. H. Ng, H. Yu, T. Ito, AGAMOUS controls *GIANT KILLER*, a multifunctional  
274 chromatin modifier in reproductive organ patterning and differentiation. *PLoS Biology*  
275 **7**, e1000251 (2009).

276 29. P. Langfelder, S. Horvath, WGCNA: an R package for weighted correlation  
277 network analysis. *BMC Bioinformatics* **9**, 559 (2008).

278 30. L. Tian *et al.*, Genome-wide comparison of allele-specific gene expression  
279 between African and European populations. *Human Molecular Genetics* **27**,  
280 1067-1077 (2018).

281 31. M. A. Wilson, K. D. Makova, Genomic analyses of sex chromosome evolution.  
282 *Annual Review of Genomics and Human Genetics* **10**, 333-354 (2009).

283 32. F. Veyrunes *et al.*, Bird-like sex chromosomes of platypus imply recent origin of  
284 mammal sex chromosomes. *Genome Research* **18**, 965-973 (2008).

285 33. S. S. Rao *et al.*, A 3D map of the human genome at kilobase resolution reveals

- 286 principles of chromatin looping. *Cell* **159**, 1665-1680 (2014).
- 287 34. N. Servant *et al.*, HiC-Pro: an optimized and flexible pipeline for Hi-C data
- 288 processing. *Genome Biology* **16**, 259 (2015).
- 289 35. N. C. Durand *et al.*, Juicer provides a one-click system for analyzing
- 290 loop-resolution Hi-C experiments. *Cell Systems* **3**, 95-98 (2016).
- 291 36. O. Dudchenko *et al.*, *De novo* assembly of the *Aedes aegypti* genome using Hi-C
- 292 yields chromosome-length scaffolds. *Science* **356**, 92-95 (2017).
- 293 37. Y. Tang *et al.*, GAPIT Version 2: An enhanced integrated tool for genomic
- 294 association and prediction. *Plant Genome* **9**, (2016).
- 295 38. H. Li, R. Durbin, Fast and accurate short read alignment with Burrows-Wheeler
- 296 transform. *Bioinformatics* **25**, 1754-1760 (2009).
- 297 39. H. Li *et al.*, The Sequence Alignment/Map format and SAMtools. *Bioinformatics*
- 298 **25**, 2078-2079 (2009).
- 299 40. P. Danecek *et al.*, The variant call format and VCFtools. *Bioinformatics* **27**,
- 300 2156-2158 (2011).
- 301 41. S. Purcell *et al.*, PLINK: a tool set for whole-genome association and
- 302 population-based linkage analyses. *American Journal of Human Genetics* **81**, 559-575
- 303 (2007).
- 304 42. S. Kumar, G. Stecher, K. Tamura, MEGA7: Molecular Evolutionary Genetics
- 305 Analysis version 7.0 for bigger datasets. *Molecular Biology and Evolution* **33**,
- 306 1870-1874 (2016).
- 307 43. S. M. E. Sahraeian *et al.*, Gaining comprehensive biological insight into the
- 308 transcriptome by performing a broad-spectrum RNA-seq analysis. *Nature*
- 309 *Communication* **8**, 59 (2017).

310

## 311 ACKNOWLEDGEMENTS

312 The authors are grateful to Dr. Qi Zhou for his constructive discussion and comments  
313 and to Fei-Da Ni, Lin-Jing Shi, Ya-Li Mu, Yi-Feng Lin and Ke Luo from Zhejiang  
314 University for their experimental assistance with validation of SDR. This study was  
315 supported by Shenzhen Municipal Government of China (JCYJ20151015162041454 to  
316 W. C. and JCYJ20150529150505656 to X. L), National Key R&D Program of China  
317 (No. 2017YFA0605104), the National Natural Science Foundation of China (No.

318 31870190) and the grant from the Chinese Academy of Sciences (CAS/SAFEA  
 319 International Partnership Program for Creative Research Teams). **Author**  
 320 **contributions:** X.L., G.-Y.F., Y.-P.Z. and X.X. conceived the project. Y.-P.Z., S.G.,  
 321 C.-X.F., S. M.-Y. L., Y.-J.X., J.W., H.-M. Y. and X.X. supervised the study. Y.-P.Z.,  
 322 P.-P.Y., H.-Y.L. and W.-H.L. collected samples. K.-J.G. conducted validation  
 323 experiments. H.Z., R.Z., X.-W.Y., K.-J.G., W.-B.C., Y.C., Q.L., X.-N.H., J.-F.T.,  
 324 S.-S.L., L.-Q.L., F.-M.Z. and J.-N.L. conducted data analysis. C.-Y.W., X.-S.S. and  
 325 S.-S.L. conducted the genome and transcriptome sequencing. Q.-W.X. and Y.-T.Q.  
 326 constructed the Hi-C library and quality control. G.-Y.F., H.Z., X.L., Y.-P.Z., I.S. and  
 327 R.Z. wrote the manuscript with the help from all co-authors. **Competing interests:** The  
 328 authors declare no competing interests. **Data and materials availability:** The ginkgo  
 329 chromosome-level genome involved in this study was deposited in CNSA with the  
 330 accession number CNA0000042 (Project ID: CNP0000122). All other relevant data  
 331 supporting the findings of the study are available in this article, in the Extended Data,  
 332 or from the corresponding authors upon request.

333

## 334 **SUPPLEMENTARY MATERIALS**

335 Materials and Methods

336 Figs. S1 to S11

337 Tables S1 to S9

338 References (33–43)

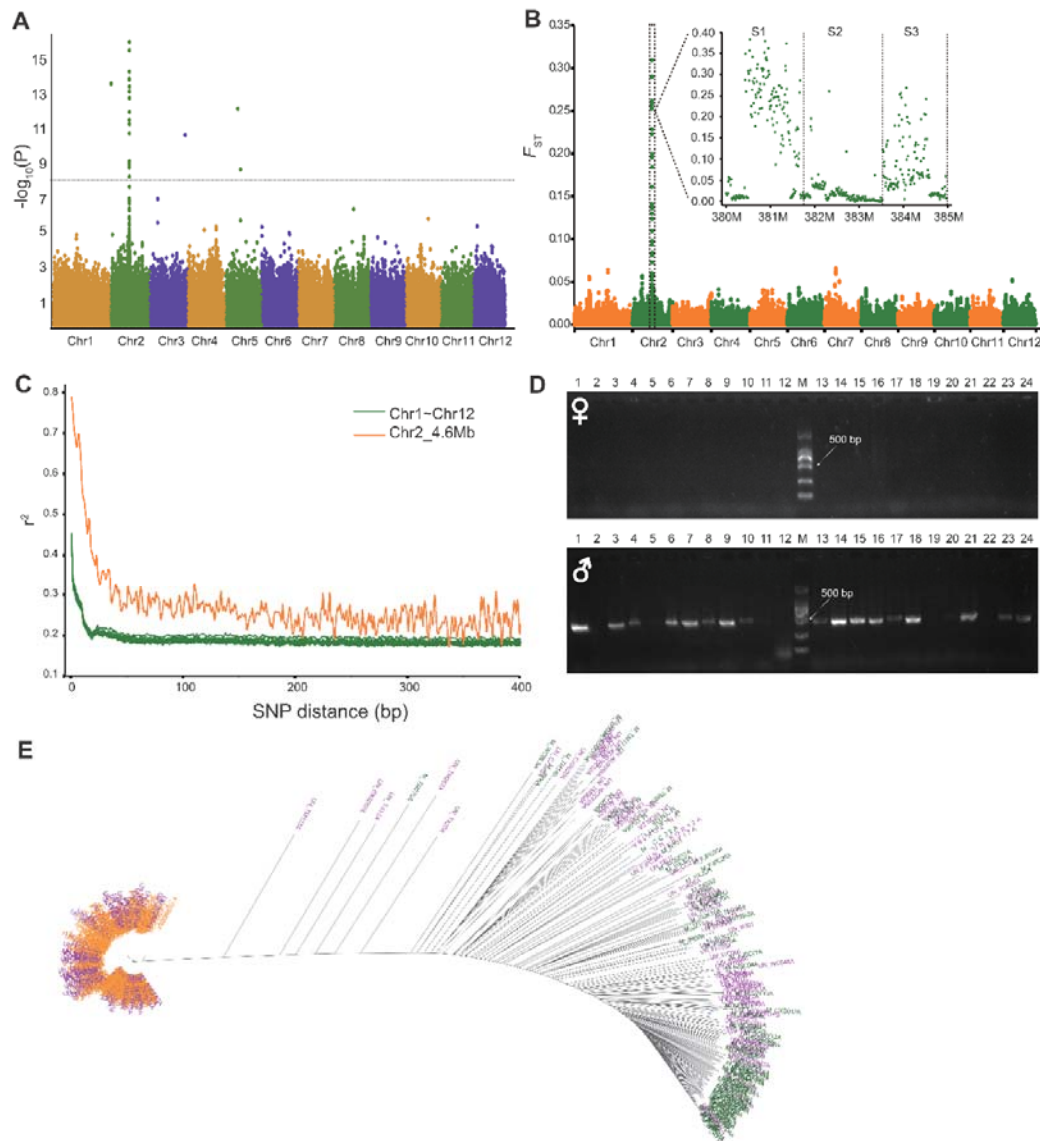

339  
340 **Fig. 1. 4.6 Mb region on chromosome 2 is a candidate ginkgo sex-determination**  
341 **region.** (A) Manhattan plot of a genome-wide association study (GWAS) for SNPs  
342 associated with sex on 97 male and 295 female specimens. Negative log<sub>10</sub> *P*-value  
343 from linear mixed model (y-axis) are plotted against SNP positions (x-axis) on each of  
344 the 12 ginkgo chromosomes. The genome-wide significant *P*-value threshold (10<sup>-8</sup>) is  
345 indicated by a horizontal line. (B) The 4.6 Mb region on Chr2 is highly differentiated  
346 between ginkgo sexes, indicated by high population differentiation (*F*<sub>ST</sub>) values  
347 (x-axis). Ginkgo chromosomes are shown on the y-axis. (C) SNPs spanning the 4.6  
348 Mb region on Chr2 constitute a linkage disequilibrium (LD) block. Average genotypic  
349 association coefficient  $r^2$  (y-axis) is presented as a function of inter-SNP distance  
350 (x-axis) between 4.6 Mb region and whole genome. (D) Gel photograph of PCR

351 amplicons. Validation of PCR amplification using specific designed primes for SNP  
 352 on Chr2: 383,550,476 of 24 males and 24 females. **(E)** A neighbor-joining (NJ) tree  
 353 constructed using 19,164 SNPs in the sex-determination region clusters 545 ginkgo  
 354 specimen by sex. Specimens with known sex classification are labeled in orange  
 355 (female;  $n=265$ ) and green (males,  $n=97$ ); specimens with unknown information  
 356 ( $n=183$ ) in purple.

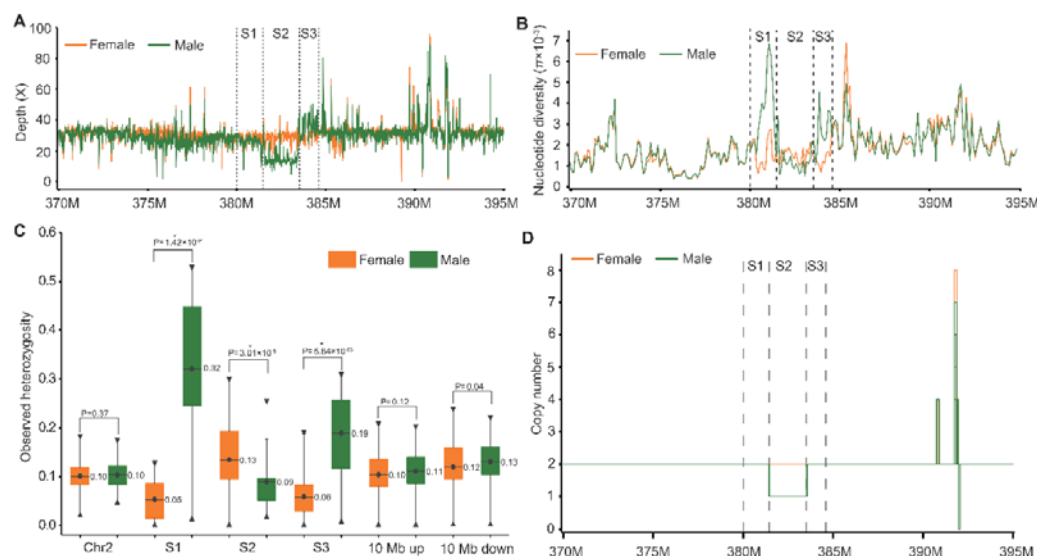

**Fig. 2 Further dissection of the ginkgo sex-determination region. Four males and five females were sequenced at high depth (~30×). (A)** Sequencing depth in the sex-determination region is similar in both ends (sex-determination region 1, S1, Chr2:380.00-381.46 Mb; sex-determination region 3, S3, Chr2:383.52-384.60 Mb) but lower in males in the middle (sex-determination region, S2, Chr2:381.46-383.52 Mb). Average mapping depth of males and females are shown in 10-kb window. Depth on the y-axis, chromosome 2 region on the x-axis. **(B)** Nucleotide diversity ( $\pi$ ) in the males are in the sex-determination region (especially in S1 and S3 regions). Examined using a 100-kb window size. Nucleotide diversity ( $\pi$ ) on the y-axis, chromosome 2 region on the x-axis. **(C)** Observed heterozygosity in sex-determination regions S1 to S3 and chromosomal other regions in ginkgo sexes. Heterozygosity on the y-axis, chromosome region on the x-axis. **(D)** Estimated copy number is two for the S1 and S3 regions and one for the S2 region. Copy number on the y-axis, chromosome 2 region on the x-axis.



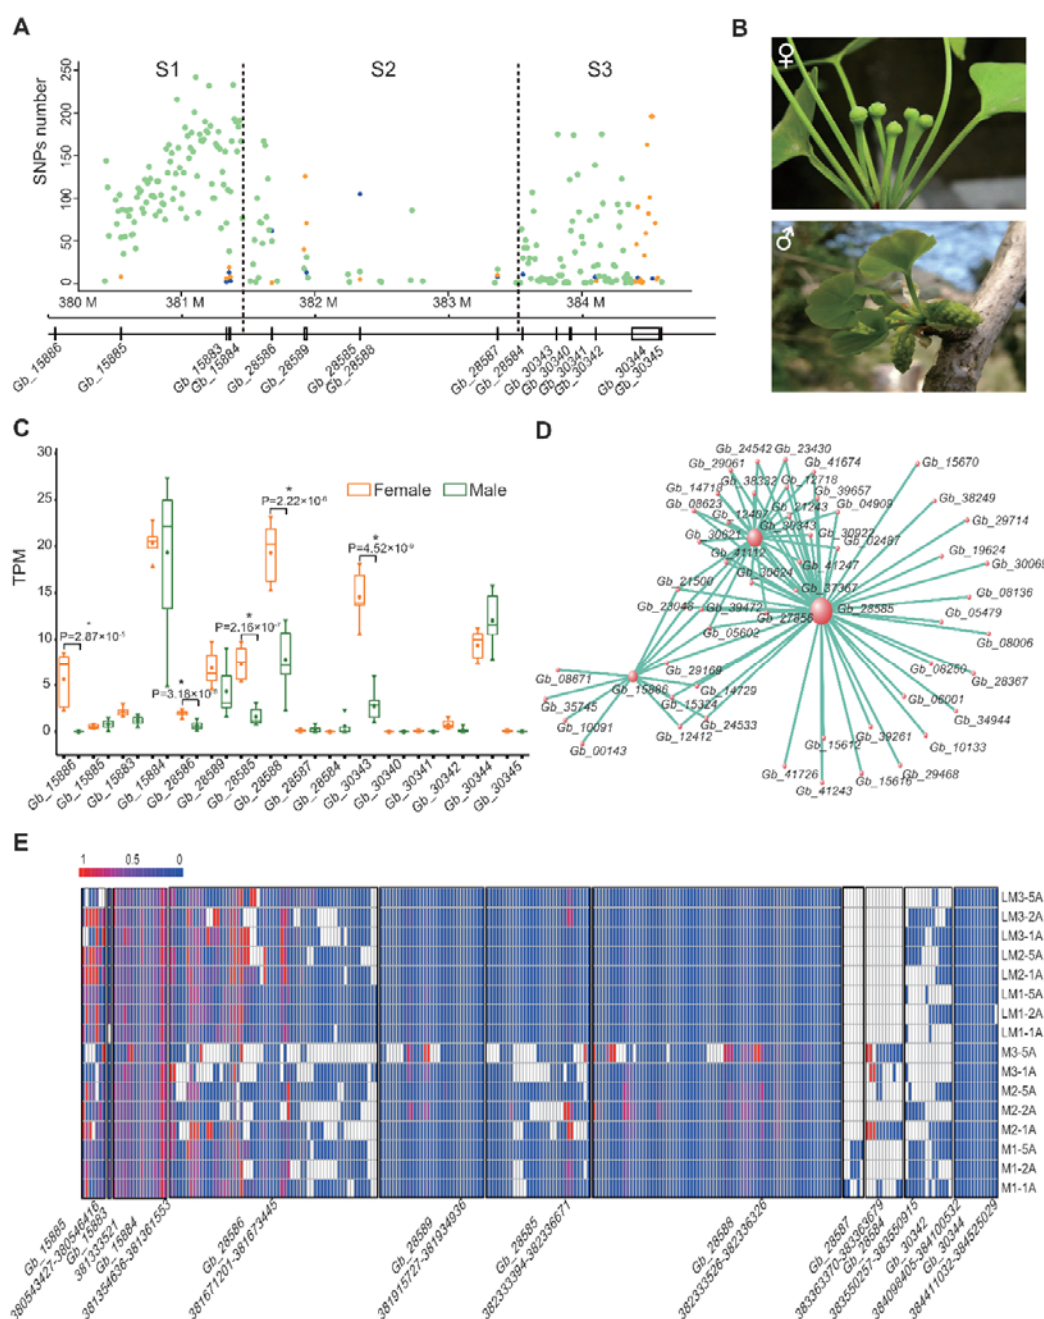

**Fig. 3. Identification of candidate ginkgo sex-determination genes.** (A) Overview of 16 protein-coding genes in the sex-determination region. SNP counts on the y-axis, chromosome 2 region on the x-axis. (B) Images of male and female cones of ginkgo (photographed by Y.-P.Z.). (C) Differential expression of candidate sex-determination genes in ginkgo cone tissue. Expression (TPM, transcripts per million) on the y-axis, gene symbols on the x-axis. (D) Top 50 genes correlated with sex-determination genes in a ginkgo cone tissue co-expression network. Nodes represents genes and

node size reflect the number of connections for each node. Three genes in the sex-determination region (Gb\_15886, Gb\_28585 and Gb\_30343) were identified as hub genes (the most connected, or central genes). **(E)** A heat map showing the expression of 11 genes in sex-determination region with phased SNP haplotypes. 18 male samples are shown (8 cones, 8 leaves). Gene expression (TPM) shown on as a colour gradient: white being no expression detected; blue and red low and high Y haplotype expression, respectively.

389 **Table 1. Genes in the ginkgo sex-determination region (SDR).** For each gene, the  
390 top-candidate ortholog, the associated SDR region, and allele specific gene expression  
391 is indicated (a dash indicates that no data could be obtained).

| Gene ID         | Homologous protein | Description                                | SDR | Allele |
|-----------------|--------------------|--------------------------------------------|-----|--------|
| <i>Gb_15883</i> | <i>RR12</i>        | Response regulator 12                      | S1  | X/Y    |
| <i>Gb_15884</i> | <i>RR2</i>         | Response regulator 2                       | S1  | Y      |
| <i>Gb_15885</i> | <i>ELF6</i>        | ARLY FLOWERING 6                           | S1  | Y      |
| <i>Gb_15886</i> | <i>AT4G31910</i>   | BR-related AcylTransferase1                | S1  | -      |
| <i>Gb_28584</i> | <i>AT4G22030</i>   | Putative F-box protein                     | S3  | X/Y    |
| <i>Gb_28585</i> | - -                |                                            | S2  | X/Y    |
| <i>Gb_28586</i> | <i>SLO2</i>        | SLOW GROWTH 2                              | S2  | X/Y    |
| <i>Gb_28587</i> | <i>AGL6</i>        | AGAMOUS-like 6                             | S2  | X      |
| <i>Gb_28588</i> | <i>AT3G01930</i>   | Major facilitator protein                  | S2  | X      |
| <i>Gb_28589</i> | <i>AT4G31020</i>   | Esterase/lipase domain-containing protein  | S2  | X      |
| <i>Gb_30340</i> | - -                |                                            | S3  | -      |
| <i>Gb_30341</i> | <i>AT3G17450</i>   | hAT dimerisation domain-containing protein | S3  | -      |
| <i>Gb_30342</i> | <i>AT3G17450</i>   | hAT dimerisation domain-containing protein | S3  | X      |
| <i>Gb_30343</i> | <i>BIO1</i>        | Biotin auxotroph 1                         | S3  | -      |
| <i>Gb_30344</i> | <i>AT4G30310</i>   | FGGY family of carbohydrate kinase         | S3  | X      |
| <i>Gb_30345</i> | <i>AT3G17450</i>   | hAT dimerisation domain-containing protein | S3  | -      |

392
